# Supplementary material for: ﻿A new species of scops-owl (Aves, Strigiformes, Strigidae, Otus) from Príncipe Island (Gulf of Guinea, Africa) and novel insights into the systematic affinities within Otus
Source: Zookeys. 2022 Oct 30;1126:1–54. doi: 10.3897/zookeys.1126.87635 (PMC9836643; doi:10.3897/zookeys.1126.87635)
Supplement: Supplementary material 7 — Table S2. Details of song recordings [file zookeys-1126-001_article-87635__-s007.xls]

## Sheet: TableS2
Table S2. Details of song recordings used for bioacoustic analyses.
Recording codes - XC: Xeno-canto; IBC: The Internet Bird Collection (now under the Macaulay Library); AV: Avian Vocalizations Center (AVoCet)
STP: São Tomé and Príncipe
Taxon	Recording	Location	Recordist	Date
O. bikegila sp. nov.	XC619438	c. Ribeira Porco, Príncipe, STP	Martim Melo	2018-07-26
O. bikegila sp. nov.	XC619439	between Ribeira Porco and Ribeira São Tomé, Príncipe, STP	Martim Melo	2018-07-28
O. bikegila sp. nov.	XC619441	below Barriga Branca, Príncipe, STP	Martim Melo	2018-07-29
O. bikegila sp. nov.	XC619442	Ribeira Porco, Príncipe, STP	Martim Melo	2018-07-25
O. bikegila sp. nov.	XC619443	Praia Cara area, Príncipe, STP	Martim Melo	2019-01-15
O. hartlaubi	XC618952	Monte Carmo, São Tomé, STP	Philippe Verbelen	2016-08-03
O. hartlaubi	XC618954	Monte Carmo, São Tomé, STP	Philippe Verbelen	2016-08-12
O. hartlaubi	IBC1463283	Obô National Park, São Tomé, STP	Phil Gregory	2018-01-17
O. hartlaubi	XC132984	Monte Carmo, São Tomé, STP	Todd Mark	2013-04-28
O. hartlaubi	XC673669	Macambrara, São Tomé, STP	Aloïs Robert	2016-09-22
O. senegalensis senegalensis	XC45502	Mole National Park, Ghana	Mike Nelson	2010-03-05
O. senegalensis senegalensis	XC398169	Lukusuzi NP, Eastern province, Zambia	Peter Boesman	2017-12-07
O. senegalensis senegalensis	XC346931	Halali camp, Etosha National Park, Namibia	Peter Boesman	2016-11-14
O. senegalensis senegalensis	XC34022	Soma swamps, Gambia	Ole Jakobsen and Niels Krabbe	1977-11-01
O. senegalensis feae	XC340505-R013	near Pico Lago, Annobón, Equatorial Guinea	Brendan Sloan	2016-10-22
O. senegalensis feae	XC340506-R012	near Pico Lago, Annobón, Equatorial Guinea	Brendan Sloan	2016-10-22
O. senegalensis feae	XC340717-R011	near Pico Lago, Annobón, Equatorial Guinea	Brendan Sloan	2016-10-22
O. pembaensis	XC253581	Wete, Pemba, Tanzania	Robrecht Debbaut, Jonas Pottier	2012-08-06
O. pembaensis	XC85881	Ngezi Forest, Pemba, Tanzania	Charles Davies	2011-07-29
O. pembaensis	XC282353	Ngezi Forest edge, Pemba, Tanzania	Andrew Perkin	1998-04-01
O. pembaensis	AV13038	Ngezi Forest, Makangale, Pemba, Tanzania	Pamela C. Rasmussen	2011-05-16
O. pembaensis	AV13037	Ngezi Forest, Makangale, Pemba, Tanzania	Pamela C. Rasmussen	2011-05-16
O. pamelae	XC371431	Ayn Hamran, Dhofar, Oman	Matthias Feuersenger	2014-01-06
O. pamelae	XC307557	Wadi Darbat, Oman	Gareth K.	2016-02-27
O. pamelae	XC255290	Tobraq, Oman	Said Mohammed Alshanfari	2015-07-02
O. pamelae	XC205886	Wadi Darbat, Oman	Oscar Campbell	2014-12-06
O. pamelae	XC444472	Dhofar Governorate, Oman	Audevard Aurélien	2018-11-20
O. scops	XC397258	Velaux, Bouches-du-Rhône, Provence-Alpes-Cote d'Azur, France	Alain Malengreau	2017-06-15
O. scops	XC392928	Serra de Tramuntana, Islas Baleares, Spain	Jonathan Farooqi	2017-04-09
O. scops	XC385243	Magliano in Toscana, Provincia di Grosseto, Toscana, Italy	Marco Dragonetti	2007-04-25
O. scops	XC383983	Ditiki Attiki, Attica, Attica, Greece	Joost van Bruggen	2017-08-11
O. scops	XC405190	Khar Turan National Park, Shahrud, Semnan, Iran	Patrik Åberg	2017-04-19
O. cyprius	XC123403	Oroklini, Larnaca, Cyprus	Johannes Honnold	2013-02-24
O. cyprius	XC407462	Aglantzia, Nicosia, Cyprus	Dobrin	2018-03-26
O. cyprius	XC422372	Peyia, Paphos, Cyprus	Julia Wittmann	2018-06-02
O. cyprius	XC428846	Sotira, Akrotiri and Dhekelia, Cyprus	Uku Paal	2018-07-20
O. cyprius	XC256102	Armou, Paphos, Cyprus	Colin Richardson	2015-07-03
O. brucei	XC120354	Takhirkol, Kazakhstan	Patrick Franke	2011-04-13
O. brucei	XC158086	Balkhash District, Almaty Province, Kazakhstan	Jacob Hervé	2013-05-20
O. brucei	XC328535	Balkhash District, Almaty Region, Kazakhstan	Manuel Schweizer	2005-06-01
O. brucei	XC44545	Khatmat Milalah, Oman	Herman van Oosten	2010-01-25
O. ireneae	XC147630	Malindi, Kilifi, Kenya	Ralf Wendt	2013-08-27
O. ireneae	XC154812	Arabuko,Sokoke Forest, Kenya	Hans Matheve	2009-07-02
