# Supplementary material for: ﻿A new species of scops-owl (Aves, Strigiformes, Strigidae, Otus) from Príncipe Island (Gulf of Guinea, Africa) and novel insights into the systematic affinities within Otus
Source: Zookeys. 2022 Oct 30;1126:1–54. doi: 10.3897/zookeys.1126.87635 (PMC9836643; doi:10.3897/zookeys.1126.87635)
Supplement: Supplementary material 11 — Table S5. PCA factor loadings of morphological variables [file zookeys-1126-001_article-87635__-s011.xls]

## Sheet: Table S4
Table S5. Factor loadings of morphological variables on the first two principal components for seven Otus taxa*.
Eigenvalues and percentage of variance explained by the respective components are given at the bottom of the table
Variable	PC1	PC2
Bilen	-0.732871	-0.533854
Binares	-0.788756	-0.449093
Biwid	-0.848922	-0.128196
Tarlen	-0.825711	-0.00774488
Wilen	-0.629202	0.706239
Tailen	-0.835436	0.498335
Eigenvalue	3.65555	1.25029
Variance explained	0.609	0.2084
* O. bikegila sp. nov., O. hartlaubi, O. senegalensis senegalensis, O. senegalensis feae, O. pembaensis, O. scops, O. brucei
Morphological measurements - Bilen: bill length from bill tip to where culmen enters feathers; Binares: bill length from the anterior end of the nares to the tip; Biwid: bill width; Tarlen: tarsus length; Wilen: wing length; Tailen: tail length
