# Supplementary material for: ﻿A new species of scops-owl (Aves, Strigiformes, Strigidae, Otus) from Príncipe Island (Gulf of Guinea, Africa) and novel insights into the systematic affinities within Otus
Source: Zookeys. 2022 Oct 30;1126:1–54. doi: 10.3897/zookeys.1126.87635 (PMC9836643; doi:10.3897/zookeys.1126.87635)
Supplement: Supplementary material 13 — Table S7. PCA factor loadings of bioacoustic variables [file zookeys-1126-001_article-87635__-s013.xls]

## Sheet: Table S6
Table S7. Factor loadings of bioacoustic variables on the four principal components in 10 Otus taxa*
Eigenvalues and percentage of variance explained by the respective components are given at the bottom of the table
Variable	PC1	PC2	PC3	PC4
F1	0.942254	0.304867	-0.0164833	0.0535954
F2	0.984144	0.0239226	-0.0668201	-0.0834754
F3	0.952232	-0.0170638	0.164626	-0.2177
F4	0.971207	-0.0533909	0.125022	-0.161847
F5	0.971084	0.0347702	0.0471104	-0.21936
F6	0.962004	0.025778	0.115293	-0.203408
F7	0.977128	0.0896177	0.0444949	0.129227
F8	0.958174	0.145956	-0.0126833	-0.222936
DT1	0.609644	-0.566884	-0.220749	0.262477
DT2	0.512355	-0.581466	-0.0884785	0.43812
DT3	-0.0114571	-0.749737	-0.323545	-0.25037
DT4	0.461259	-0.570701	0.448087	-0.0231202
DF1	-0.409728	-0.725374	-0.0754139	-0.31093
DF2	0.571918	-0.0447205	0.137659	0.709947
DFT1	0.419177	0.0752979	-0.605439	-0.157512
DFT2	0.338347	0.195912	-0.801548	0.142095
Eigenvalue	9.08	2.247	1.461	1.209
Variance explained	0.568	0.141	0.091	0.076
* O. bikegila sp. nov., O. hartlaubi, O. senegalensis senegalensis, O. senegalensis feae, O. pembaensis, O. pamelae, O. scops, O. cyprius, O. brucei, O. ireneae
Bioacoustic parameters - F1: frequency at start; F2: frequency at end; F3: frequency at 25% of total duration; F4: frequency at midpoint; F5: frequency at 75% of total duration; F6: frequency at maximum amplitude; F7: maximum frequency; F8: minimum frequency;
DT1: total duration; DT2: time to maximum amplitude; DT3: time to maximum frequency; DT4: internote interval; DF1: frequency drop from start to end; DF2: frequency range; DFT1: slope from 25% to 75% of total duration; DFT2: slope from midpoint to end.
